# Supplementary material for: Autism-associated gene shank3 is necessary for social contagion in zebrafish
Source: Springer Nature journal article supplement (doi:10.1186/s13229-023-00555-4), 2023-06-30
Supplement: MOESM1 [file 25561118]

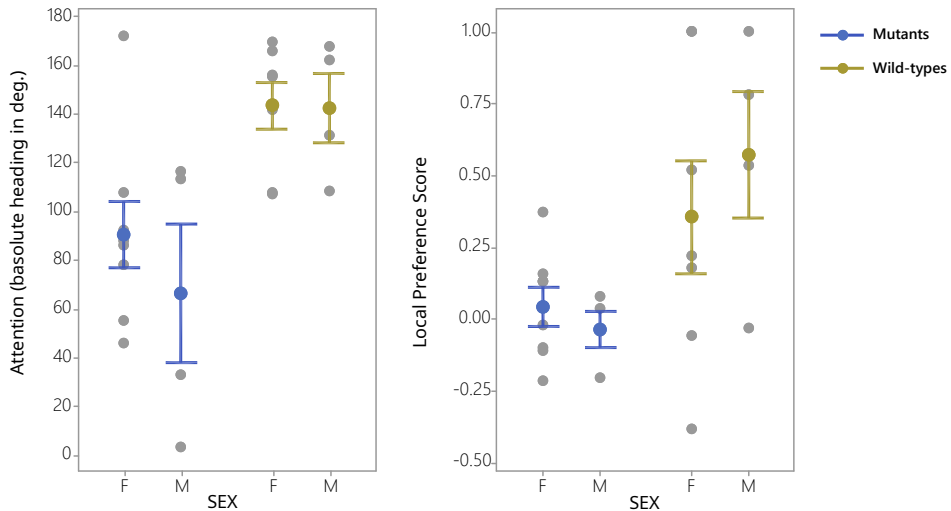

**Figure S1:** Comparisons of males (M) to females (F) of *shank3a* mutants and their wild-type siblings in attention towards distress during observation and local preference at the test phase of the behavioural experiment
