# Supplementary material for: Autism-associated gene shank3 is necessary for social contagion in zebrafish
Source: Springer Nature journal article supplement (doi:10.1186/s13229-023-00555-4), 2023-06-30
Supplement: MOESM2 [file 25561118]

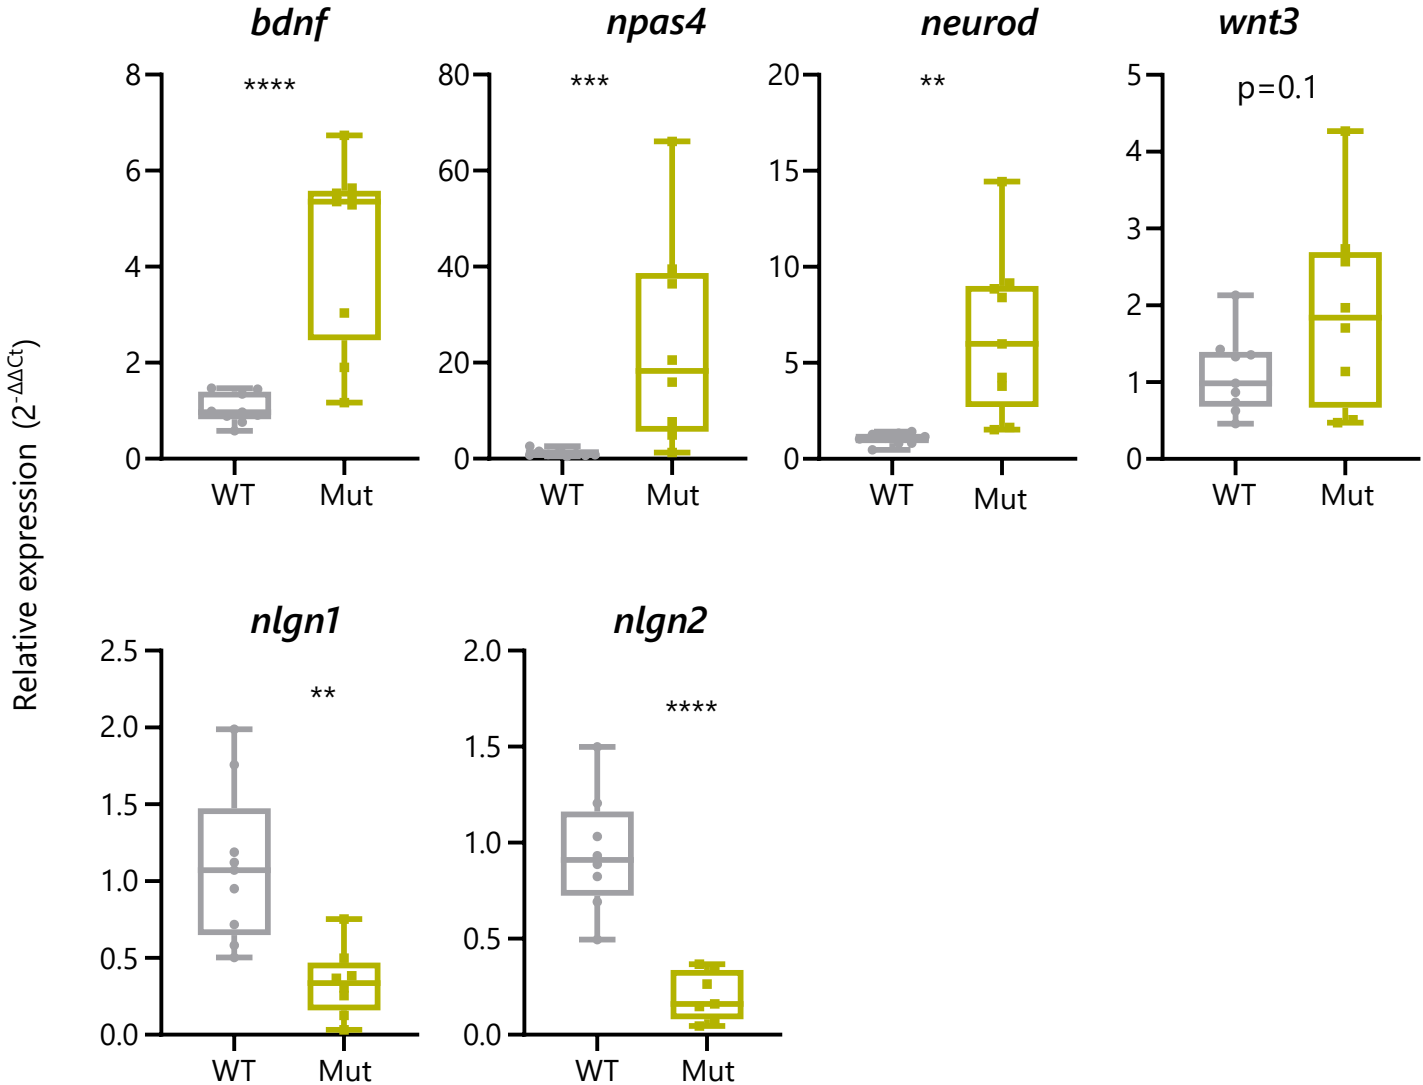

**Figure S2:** Comparisons between shank3a mutants (Mut) and their wild-type siblings in relative expression of RNA levels facross selected neuroplasticity genes.
